# Supplementary material for: Microalgae- and biochar-mediated wastewater treatment: augmentation of bioelectrochemical nitrogen removal and biogas production
Source: Research Square preprint supplement (doi:10.21203/rs.3.rs-1531440/v1), 2022-05-17
Supplement: Supplementary file 1 [file f1397d6fde6bd2b9209e2049.xlsx]

## Sheet: Raw data & stat.
BATCH A										BATCH B										BATCH C
A1 PH	A1 NH3-N	A1 NO3	A1 TSS	A2 NO3	A2 DO	A1 Biogas	A2 Biogas			B1 pH	B1 NH3	B1 NO3	B1 TSS	Algal biomass	B2 NO3	B2 DO	B1 Biogas	B2 Biogas		C1 pH	C1 NH3	C1 NO3	C1 TSS	C2 NO3	C2 DO	C1 Biogas	C2 Biogas
9.31	600	58.25	6100	1.976	3.47	0	1			7.91	600	60.61	5900	0.24	2.011	2.78	0	2		8.24	602	62.61	5800	2.365	3.24	0	1.8
9.04	598.1	98.96	5990	1.977	2.99	0	2.8			7.88	597.84	115.21	5900	0.36	2.015	2.99	0	5		8.25	602	118.21	5750	2.365	3.11	0	2.4
8.87	587.34	146.33	5700	1.981	3.92	1.2	3.5			7.88	595.78	169.82	5900	0.47	2.123	3.92	0	15		8.25	601	173.82	5700	2.364	3.82	2.4	3.7
8.11	578.37	198.34	5110	1.989	2.19	1.7	4.2			7.85	594.96	225.42	5700	0.53	2.246	3.98	1.4	25		8.13	600	228.42	5600	2.365	3.82	3.6	5
7.85	564.67	248.67	4920	1.999	3.59	2.8	5			7.41	592.74	275.02	5650	0.67	3.045	3.99	2.7	34		8.01	597	279.02	5550	2.367	3.88	3.9	7
7.95	502.54	296.15	4720	2.3	4.39	5.9	7			7.1	589.14	327.62	5650	0.74	3.945	4.03	2.9	48		7.78	595	334.62	5500	2.368	4.01	4.5	11
7.89	489.08	344.98	4600	6.8	5.16	7	9			7.21	584	381.22	5500	0.85	3.996	4.53	3.3	59		7.54	591	384.22	4950	2.369	5.16	5	15
7.86	462.56	398.12	4055	17	5.18	15	14			7.22	582	434.82	5450	0.96	2.045	5.18	3.9	71		7.36	587	436.82	4800	2.372	5.18	6.4	18
7.23	453.01	389.23	3900	25.2	4.99	20	19			7.43	577.23	429.65	5300	0.97	1.957	5.2	4.5	82		7.28	581	431.65	4600	2.385	5.83	7	23
7.08	432.08	376.98	3700	30.4	5.59	25	24			7.53	575.32	427.34	5150	0.97	1.543	5.57	5	98		7.21	573	422	4550	2.391	5.79	8.5	27
7.2	427.89	355.34	3610	20.5	5.85	30.7	32			7.55	573.56	424.98	4900	0.96	1.046	5.85	6.7	105		7.12	564	401	4500	2.402	5.85	9	34
7.32	411.23	349.89	3520	17.28	5.11	45	38			7.54	570.92	421.78	4800	0.96	0.997	587	7.8	119		7.04	556	382	4400	2.406	5.97	11	39
7.41	405.98	341.87	3450	16.11	5.66	57	45			7.56	561.56	416.45	4700	0.95	0.356	6.44	9	136		7.01	548	347	4300	2.456	6.02	13	42
7.56	389.12	322.34	3310	10.83	4.28	66	51			7.54	527.61	371.78	4700	0.87	0.324	6.89	12	144		6.76	489	293	4050	2.678	4.28	15	50
7.56	381.02	311.98	3200	8.91	3.93	79	59			7.33	501.84	352.84	4700	0.8	0	6.97	15	157		6.75	468	279	3950	2.845	3.93	16.7	54
7.57	377.99	299.89	3200	6.89	3.11	85	63			7.25	483.11	324.93	4750	0.78	3.4934	7.01	20	169		6.7	442	258	3900	2.998	3.42	18	69
7.58	375.02	294.98	3150	5.56	3.01	92	71			7.11	452.55	302.43	4600	0.75	3.1023	6.8	26	175		6.8	417	211	3800	3.211	3.03	21	81
7.46	360.13	284.98	3150	5.78	2.99	99	79			6.91	399.46	251.24	4400	0.71	2.4564	6.59	29	185		6.88	389	181	3750	3.306	2.99	24	92
7.36	345.04	271.47	3100	6.86	3.36	106	84			6.77	369.33	219.33	4200	0.67	2.1349	6.21	33	196		6.92	372	165	3600	3.512	3.24	30	105
7.26	326.77	261.29	2850	6.77	2.97	115	93			6.54	336	198.23	4100	0.62	2.3453	6.02	38	204		7.05	354	136	3450	3.619	2.97	34	119
7.21	301.22	253.82	2780	6.58	2.22	124	106			6.79	311.29	187.92	4000	0.56	2.8356	5.45	45	215		7.11	331	107	3400	3.625	2.67	41	127
7.11	286	238.98	2690	6.33	2.41	136	123			7.1	287.21	165.88	3900	0.49	3.4678	5.01	52	222		7.11	306	78	3350	3.634	2.41	49	135
6.87	257.98	227.99	2610	5.67	2.35	147	138			7.12	264.66	146.55	3800	0.31	3.9012	4.67	65	234		7.15	284	38	3250	3.707	1.89	56	146
6.57	233.02	220.11	2580	5.55	2.54	158	147			7.23	214.89	111.45	3650	0.29	4.5675	4.24	71	243		7.14	263	3	3200	3.847	1.47	67	158
6.78	211.32	211.83	2550	6.01	2.23	169	165			7.23	183.91	92.67	3500	0.22	5.0231	3.89	80	257		7.15	211	0.002	3200	3.933	1.22	80	167
6.98	196	199.25	2510	5.98	2.18	175	176			7.23	151.23	74.22	3400	0.19	5.7821	3.38	93	269		7.16	198	0.001	3100	4.294	1.22	89	179
7.2	174.13	185.26	2400	5.97	2.18	180	193			7.34	143.11	61.33	3300	0.15	6.1345	3.09	105	276		7.15	198	0	2900	4.587	1.34	97	190
7.21	142.76	176.97	2360	5.82	2.17	185	214			7.4	134.67	50.98	3200	0.09	6.0983	2.98	120	282		7.16	198	0	2800	5.211	1.62	106	208
7.23	129.35	169.67	2320	7.02	2.69	201	236			7.6	120	41.67	3150	0.07	6.0111	2.77	134	290		7.14	198	0	2700	5.895	1.78	115	215
7.24	107.55	152.87	2290	8.67	3.03	213	247			7.67	112.34	38.53	2800	0.05	5.9001	2.64	141	303		7.15	198	0	2600	6.219	3.03	120	224
7.35	80.17	111.28	1020	9.34	3.99	220	265			7.9	108	35.78	2750	0.04	5.8123	2.38	154	317		7.14	197	0	2500	6.593	4.34	132	239
7.48	68.46	98.91	900	9.87	4.05	233	279			7.54	101.23	32.88	2550	0.04	5.5251	2.22	166	328		7.16	197	0	2200	7.326	3.98	140	251
7.67	40.67	71.93	910	9.18	3.45	245	288			7.55	98.76	29.01	2350	0.03	5.2341	2.26	170	341		7.17	197	0	1900	6.794	3.05	148	260
7.68	25.87	21.29	850	9.56	3.49	267	305			7.53	97.45	27.65	1900	0.03	5.0125	2.78	178	355		7.18	196	0	1800	6.111	2.78	153	272
7.1	0.67	0.99	700	9.57	3.55	283	326			7.57	94.77	24.89	1650	0.02	4.8745	2.39	184	364		7.18	196	0	1500	5.546	1.99	165	281
	A1 PH	A1 NH3-N	A1 NO3	A1 TSS	A2 NO3	A2 DO	A1 Biogas	A2 Biogas				N2O	CH4	CO2				Anova: Single Factor								Anova: Single Factor
A1 PH	1										A1	42	32	1.86
A1 NH3-N	*0.607882576933912	1									A2	22	0.4	35.4				SUMMARY								BIOGAS
A1 NO3	-0.247626	*0.509914638068799	1								B1	48	24	1.82				Groups	Count	Sum	Average	Variance					Groups	Count	Sum	Average	Variance	min-d	max-d
A1 TSS	*0.688410151696185	*0.963234431871587	*0.353372173828844	1							B2	10	0.2	49				N2O	6	158	26.3333	285.467					A1 Biogas	35	3789.3	108.3 + 88.1	7764.04	0	283			88.1138	108.3 + 88.1
A2 NO3	*-0.351437071771474	-0.0223578	*0.504457438166989	-0.144543	1						C1	30	22	1.88				CH4	6	78.78	13.13	209.97					A2 Biogas	35	3912.5	111.8 + 103.0	10611.1	1	326			103.01	111.8 + 103.0
A2 DO	0.14718	0.337443	0.490561	0.221507	*0.708805851683198	1					C2	6	0.18	34.4				CO2	6	124.36	20.7267	454.052					B1 Biogas	35	1978.2	56.52 + 62.1	3861.91	0	184			62.1443	56.52 + 62.1
A1 Biogas	*-0.531344871079776	*-0.985285509982582	*-0.618078537363692	*-0.932745529471	-0.109307	*-0.447137162714702	1																				B2 Biogas	35	6325	180.7 + 109.9	12085	2	364			109.932	180.7 + 109.9
A2 Biogas	*-0.452615755777851	*-0.975872251223172	*-0.674311212651794	*-0.905455434402385	-0.0905358	*-0.385677673060804	*0.986140967017324	1			N2O		CH4		CO2												C1 Biogas	35	1791	51.2 +53.3	2844.86	0	165			53.3372	51.2 +53.3
																		ANOVA									C2 Biogas	35	3850.9	110 + 92.4	8533.87	1.8	281			92.379	110 + 92.4
											Mean	26.3333	Mean	13.13	Mean	20.7267		Source of Variation	SS	df	MS	F	P-value	F crit
	B1 pH	B1 NH3	B1 NO3	B1 TSS	Algal Biomass	B2 NO3	B2 DO	B1 Biogas	B2 Biogas		Standard Error	6.89766	Standard Error	5.91566	Standard Error	8.69915		Between Groups	526.944	2	263.472	0.832465	0.454107	3.68232
B1 pH	1										Median	26	Median	11.2	Median	18.14		Within Groups	4747.44	15	316.496					ANOVA
B1 NH3	0.0849857	1									Mode	#N/A	Mode	#N/A	Mode	#N/A										Source of Variation	SS	df	MS	F	P-value	F crit
B1 NO3	-0.192823	*0.81018540679502	1								Standard Deviation	16.8958	Standard Deviation	14.4903	Standard Deviation	21.3085		Total	5274.39	17						Between Groups	386412	5	77282.4	10.1463	1.07891e-08	2.25834
B1 TSS	-0.145531	*0.884091165565495	*0.836448943309297	1							Sample Variance	285.467	Sample Variance	209.97	Sample Variance	454.052										Within Groups	1.55382e+06	204	7616.79
Algal biomass	-0.276084	*0.837689366105408	*0.983665595065011	*0.879933244540756	1						Kurtosis	-1.75525	Kurtosis	-2.60963	Kurtosis	-2.51181
B2 NO3	0.0281119	*-0.831209812611833	*-0.776734128732632	*-0.787572300375705	*-0.823637812373148	1					Skewness	0.0759113	Skewness	0.227279	Skewness	0.252663										Total	1.94024e+06	209
B2 DO	0.0752458	0.17811	0.264193	0.17915	0.24581	-0.232615	1				Range	42	Range	31.82	Range	47.18
B1 Biogas	0.142095	*-0.942130345109843	*-0.789306256999666	*-0.955871811638507	*-0.849700813051152	*0.807245264420119	-0.146974	1			Minimum	6	Minimum	0.18	Minimum	1.82										A1 Biogas		A2 Biogas		B1 Biogas		B2 Biogas		C1 Biogas		C2 Biogas
B2 Biogas	-0.15124	*-0.959471627398752	-0.64974	-0.823564	*-0.688028752117291	*0.703583549423147	-0.103448	*0.919707918661633	1		Maximum	48	Maximum	32	Maximum	49
											Sum	158	Sum	78.78	Sum	124.36										Mean	108.266	Mean	111.786	Mean	56.52	Mean	180.714	Mean	51.1714	Mean	110.026
											Count	6	Count	6	Count	6										Standard Error	14.8939	Standard Error	17.4119	Standard Error	10.5043	Standard Error	18.5818	Standard Error	9.01564	Standard Error	15.6149
	C1 pH	C1 NH3	C1 NO3	C1 TSS	C2 NO3	C2 DO	C1 Biogas	C2 Biogas			Confidence Level(95.0%)	17.731	Confidence Level(95.0%)	15.2067	Confidence Level(95.0%)	22.3619										Median	99	Median	79	Median	29	Median	185	Median	24	Median	92
C1 pH	1																									Mode	0	Mode	#N/A	Mode	0	Mode	#N/A	Mode	0	Mode	#N/A
C1 NH3	*0.484759354368199	1																								Standard Deviation	88.1138	Standard Deviation	103.01	Standard Deviation	62.1443	Standard Deviation	109.932	Standard Deviation	53.3372	Standard Deviation	92.379
C1 NO3	0.0392878	*0.849308090121153	1																							Sample Variance	7764.04	Sample Variance	10611.1	Sample Variance	3861.91	Sample Variance	12085	Sample Variance	2844.86	Sample Variance	8533.87
C1 TSS	*0.638243570649427	*0.936711880637418	*0.67444376536896	1																						Kurtosis	-1.11017	Kurtosis	-0.846576	Kurtosis	-0.680377	Kurtosis	-1.1571	Kurtosis	-0.737237	Kurtosis	-1.22224
C2 NO3	-0.308227	*-0.886585685243385	*-0.771399052833017	*-0.880944988469279	1																					Skewness	0.338013	Skewness	0.696263	Skewness	0.890185	Skewness	-0.0573875	Skewness	0.855741	Skewness	0.432727
C2 DO	0.0744563	*0.721205645123833	*0.849629146720933	*0.502142786375336	*-0.465612662879317	1																				Range	283	Range	325	Range	184	Range	362	Range	165	Range	279.2
C1 Biogas	-0.29648	*-0.906799415079735	*-0.783000419204152	*-0.910981189828837	*0.962301349571989	*-0.530054575808995	1																			Minimum	0	Minimum	1	Minimum	0	Minimum	2	Minimum	0	Minimum	1.8
C2 Biogas	*-0.422389317734291	*-0.965419452885654	*-0.810462371526634	*-0.961484120868838	*0.952548988647278	*-0.597101565005052	*0.979042246986005	1																		Maximum	283	Maximum	326	Maximum	184	Maximum	364	Maximum	165	Maximum	281
																										Sum	3789.3	Sum	3912.5	Sum	1978.2	Sum	6325	Sum	1791	Sum	3850.9
																										Count	35	Count	35	Count	35	Count	35	Count	35	Count	35
																										Confidence Level(95.0%)	30.2681	Confidence Level(95.0%)	35.3852	Confidence Level(95.0%)	21.3473	Confidence Level(95.0%)	37.7629	Confidence Level(95.0%)	18.322	Confidence Level(95.0%)	31.7333
					Definition
				AOB	Ammonia Oxidizing Bacteria
				NOB	Nitrite Oxidizing Bacteria
				Anammox	Anaerobic Ammonia Oxidation					Abbreviation +K102:S137 Definition
				AOE	Ammonium oxidizing exoelectrogens					AOB - Ammonia Oxidizing Bacteria
				DNE	Denitrifying Electrotrophs					NOB - Nitrite Oxidizing Bacteria
				DIET	Direct Interspecies Electron Transfer					Anammox - Anaerobic Ammonia Oxidation
				DNA	Deoxyribonucleic Acid					AOE - Ammonium oxidizing exoelectrogens
				RNA	Ribonucleic Acid					DNE - Denitrifying Electrotrophs
				USSR	Union of Soviet Socialist Republics					DIET - Direct Interspecies Electron Transfer
				PSA	Pressure Swing Adsorption					DNA - Deoxyribonucleic Acid
				OFN	Oxygen-free Nitrogen					RNA - Ribonucleic Acid
				PPM	Part Per Million					USSR - Union of Soviet Socialist Republics
				GS	Gln Synthetase					PSA - Pressure Swing Adsorption
				GOGAT	Glu 2-oxoglutarate aminotransferase					OFN - Oxygen-free Nitrogen
				GDH	Glu Dehydrogenase					PPM - Part Per Million
				Nr	Reactive Nitrogen					GS: - Gln Synthetase
				WHO	World Health Organization					GOGAT - Glu 2-oxoglutarate aminotransferase
				NR	Nitrate Reductase					GDH - Glu Dehydrogenase:
				NADH	Nicotinamide Adenine Dinucleotide					Nr - Reactive Nitrogen
				NADPH	Nicotinamide Adenine Dinucleotide Phosphate					WHO - World Health Organization
				BOD	Biological Oxygen Demand					NR - Nitrate Reductase
				COD	Chemical Oxygen Demand					NADH - Nicotinamide Adenine Dinucleotide
				EET	Extracellular Electron Transfer					NADPH - Nicotinamide Adenine Dinucleotide Phosphate
				EIA	Energy Information Administration					BOD - Biological Oxygen Demand
				BECs	Bioelectrochemical Cells					COD - Chemical Oxygen Demand
				GG-syringe	Gas glass-syringe					EET - Extracellular Electron Transfer
				APHA	American Public Health Association					EIA - Energy Information Administration
				TCD	Thermal Conductivity Detector					BECs -
				PCR	Polyremase Chain Reaction					GG-syringe - Gas glass-syringe
				PERMANOVA	Permutational Analysis of Variance					APHA - American Public Health Association
				RDA	Redundancy Analysis					TCD - Thermal Conductivity Detector
				MANOVA	Multivariate Analysis of Variance					PCR - Polyremase Chain Reaction
				PICRUSt	Phylogenetic Investigation of Communities by Reconstruction of Unobserved States					PERMANOVA - Permutational Analysis of Variance
				KEGG	Kyoto Encyclopedia of Genes and Genomes					RDA - Redundancy Analysis
				OTUs	Operational Units					MANOVA - Multivariate Analysis of Variance
				CEM	Cation Exchange Membrane					PICRUSt - Phylogenetic Investigation of Communities by Reconstruction of Unobserved States
				ADRR	Average Daily Removal Rate					KEGG - Kyoto Encyclopedia of Genes and Genomes
				DNB	Denitrifying Bacteria					OTUs - Operational Units
				RSVs	Ribosomal Sequence Variants					CEM - Cation Exchange Membrane
				ANOVA	Analysis of Variance					ADRR - Average Daily Removal Rate
				SEM	Scan Electron Microscope					DNB - Denitrifying Bacteria
				UPGMA	Unweighted Pair-group Method with Arithmetic Mean					RSVs - Ribosomal Sequence Variants
				PCA	Principal Component Analyses					ANOVA - Analysis of Variance
										SEM - Scan Electron Microscope
										UPGMA - Unweighted Pair-group Method with Arithmetic Mean
										PCA - Principal Component Analyses

## Sheet: NH3 and pH in anode
Daily NH3 Conc.			Daily removal rate										Anova: Single Factor									A1 pH	B1 pH	C1 pH	A1 pH		B1 pH		C1 pH
A1 NH3	B1 NH3	C1 NH3	A1 DRR	B1 DRR	C1 DRR	A1 DRR		B1 DRR		C1 DRR												9.31	7.91	8.24
600	600	602	0	0	0								SUMMARY									9.04	7.88	8.25	Mean	7.51857	Mean	7.38057	Mean	7.26657
598.1	597.84	602	1.9	2.16	0	Mean	17.1237	Mean	14.4351	Mean	11.6		Groups	Count	Sum	Average	Variance	Min	Max			8.87	7.88	8.25	Standard Error	0.0996381	Standard Error	0.0560881	Standard Error	0.0725154
587.34	595.78	601	10.76	2.06	1	Standard Error	1.94487	Standard Error	2.51417	Standard Error	2.46324		A1 DRR	35	599.33	17.1 + 11.5	132.388	0	62.13			8.11	7.85	8.13	Median	7.36	Median	7.41	Median	7.15
578.37	594.96	600	8.97	0.82	1	Median	15.22	Median	7.66	Median	6		B1 DRR	35	505.23	14.4 + 14.9	221.236	0	53.09			7.85	7.41	8.01	Mode	7.23	Mode	7.54	Mode	7.15
564.67	592.74	597	13.7	2.22	3	Mode	#N/A	Mode	#N/A	Mode	0		C1 DRR	35	406	11.6 + 14.6	212.365	0	59			7.95	7.1	7.78	Standard Deviation	0.589467	Standard Deviation	0.331822	Standard Deviation	0.429007
502.54	589.14	595	62.13	3.6	2	Standard Deviation	11.506	Standard Deviation	14.874	Standard Deviation	14.5727											7.89	7.21	7.54	Sample Variance	0.347471	Sample Variance	0.110106	Sample Variance	0.184047
489.08	584	591	13.46	5.14	4	Sample Variance	132.388	Sample Variance	221.236	Sample Variance	212.365											7.86	7.22	7.36	Kurtosis	2.74009	Kurtosis	0.117806	Kurtosis	0.903689
462.56	582	587	26.52	2	4	Kurtosis	5.70486	Kurtosis	0.141443	Kurtosis	3.07655				ANOVA							7.23	7.43	7.28	Skewness	1.52633	Skewness	-0.442212	Skewness	1.31054
453.01	577.23	581	9.55	4.77	6	Skewness	1.64041	Skewness	1.03458	Skewness	1.6913				Source of Variation	SS	df	MS	F	P-value	F crit	7.08	7.53	7.21	Range	2.74	Range	1.37	Range	1.55
432.08	575.32	573	20.93	1.91	8	Range	62.13	Range	53.09	Range	59				Between Groups	534.075	2	267.038	1.41542	0.247551	3.08547	7.2	7.55	7.12	Minimum	6.57	Minimum	6.54	Minimum	6.7
427.89	573.56	564	4.19	1.76	9	Minimum	0	Minimum	0	Minimum	0	P-value	F crit		Within Groups	19243.6	102	188.663				7.32	7.54	7.04	Maximum	9.31	Maximum	7.91	Maximum	8.25
411.23	570.92	556	16.66	2.64	8	Maximum	62.13	Maximum	53.09	Maximum	59	0.233307	3.08547									7.41	7.56	7.01	Sum	263.15	Sum	258.32	Sum	254.33
405.98	561.56	548	5.25	9.36	8	Sum	599.33	Sum	505.23	Sum	406				Total	19777.7	104					7.56	7.54	6.76	Count	35	Count	35	Count	35
389.12	527.61	489	16.86	33.95	59	Count	35	Count	35	Count	35											7.56	7.33	6.75	Confidence Level(95.0%)	0.202489	Confidence Level(95.0%)	0.113985	Confidence Level(95.0%)	0.147369
381.02	501.84	468	8.1	25.77	21	Confidence Level(95.0%)	3.95245	Confidence Level(95.0%)	5.1094	Confidence Level(95.0%)	5.00591											7.57	7.25	6.7
377.99	483.11	442	3.03	18.73	26																	7.58	7.11	6.8
375.02	452.55	417	2.97	30.56	25		A1 ADRR	17.1 + 11.5	MIN	0	MAX	62.13	SAM VARIANCE	132.39								7.46	6.91	6.88
360.13	399.46	389	14.89	53.09	28		B1 ADRR	14.4 + 14.9	MIN	0	MAX	53.09	SAM VARIANCE	221.24								7.36	6.77	6.92				Mean+SD
345.04	369.33	372	15.09	30.13	17		C1 ADRR	11.6 + 14.6	MIN	0	MAX	59	SAM VARIANCE	212.36								7.26	6.54	7.05			A1	7.5+0.6
326.77	336	354	18.27	33.33	18																	7.21	6.79	7.11			B1	7.4+0.3
301.22	311.29	331	25.55	24.71	23		A1 - NH3 REMOVAL EFFICIENCY			0.96												7.11	7.1	7.11			C1	7.3+0.4
286	287.21	306	15.22	24.08	25		B1 - NH3 REMOVAL EFFICIENCY			0.97												6.87	7.12	7.15
257.98	264.66	284	28.02	22.55	22		C1 - NH3 REMOVAL EFFICIENCY			0.67												6.57	7.23	7.14
233.02	214.89	263	24.96	49.77	21																	6.78	7.23	7.15
211.32	183.91	211	21.7	30.98	52																	6.98	7.23	7.16
196	151.23	198	15.32	32.68	13																	7.2	7.34	7.15
174.13	143.11	198	21.87	8.12	0																	7.21	7.4	7.16
142.76	134.67	198	31.37	8.44	0																	7.23	7.6	7.14
129.35	120	198	13.41	14.67	0																	7.24	7.67	7.15
107.55	112.34	198	21.8	7.66	0																	7.35	7.9	7.14
80.17	108	197	27.38	4.34	1																	7.48	7.54	7.16
68.46	101.23	197	11.71	6.77	0																	7.67	7.55	7.17
40.67	98.76	197	27.79	2.47	0																	7.68	7.53	7.18
25.87	67.45	196	14.8	31.31	1																	7.1	7.57	7.18
25.81	20.45	196	0.06	47	0

## Sheet: NO3 in anode & cathode
Daily NO3 Conc.			Daily removal rate				Anova: Single Factor							A1 DRR		B1 DRR		C1 DRR				Daily NO3 Conc.			daily removal rate
A1 NO3	B1 NO3	C1 NO3	A1 DRR	B1 DRR	C1 DRR																	A2 NO3	B2 NO3	C2 NO3	A2 DRR	B2 DRR	C2 DRR	Anova: Single Factor								Anova: Single Factor
58.25	60.61	62.61	0	0	0		Table 1. Average daily removal rate of nitrate - nitrogen in anode chamber							Mean	12.886	Mean	12.2706	Mean	13.0389			1.976	2.011	2.365	-0.001	-0.004	0
98.96	115.21	118.21	15.54	1.65	0.65		Groups	Count	Sum	Mean + SD	Variance	Min	Max	Standard Error	1.69347	Standard Error	2.22819	Standard Error	2.68279			1.977	2.015	2.365	-0.004	-0.108	0.001	average daily removal of NO3 - N in cathodic chamber								average NH4-N accumulation in cathodic chamber
146.33	169.82	173.82	8.88	1.64	0.64		A1 DRR	35	451.01	12.9 + 10	100.375	0	50.64	Median	10.18	Median	5.33	Median	5.17			1.981	2.123	2.364	-0.008	-0.123	-0.001	Groups	Count	Sum	Average	Variance	Min	Max		Groups	Count	Sum	Average	Variance	Min	Max
198.34	225.42	228.42	4.24	0.65	1.65		B1 DRR	35	429.47	12.3 + 13.2	173.768	0	51.19	Mode	#N/A	Mode	#N/A	Mode	0			1.989	2.246	2.365	-0.01	-0.799	-0.002	A2 DRR	35	1.976	0.06 + 3.7	13.671	-10.2	9.9		A2 NO3	35	308.232	8.81 + 6.53	42.6101	1.976	30.4
248.67	275.02	279.02	5.92	6.65	5.65		C1 DRR	35	456.36	13 + 15.9	251.908	0	54	Standard Deviation	10.0187	Standard Deviation	13.1821	Standard Deviation	15.8716			1.999	3.045	2.367	-0.301	-0.9	-0.001	B2 DRR	35	2.011	0.06 +1.2	1.3306	-3.4934	4.8745		B2 NO3	35	117.361	3.35 + 1.85	3.4332	0	6.1345
296.15	327.62	334.62	8.77	3.65	0.65									Sample Variance	100.375	Sample Variance	173.768	Sample Variance	251.908			2.3	3.945	2.368	-4.5	-0.051	-0.001	C2 DRR	35	2.365	0.07 + 1.0	0.99314	-0.733	5.546		C2 NO3	35	130.466	3.73 +1.54	2.35965	2.364	7.326
344.98	381.22	384.22	7.42	2.65	6.65									Kurtosis	6.53386	Kurtosis	1.45991	Kurtosis	-0.0445957			6.8	3.996	2.369	-10.2	1.951	-0.003
398.12	434.82	436.82	3.11	2.65	3.65		ANOVA							Skewness	2.34347	Skewness	1.40346	Skewness	1.03302			17	2.045	2.372	-8.2	0.088	-0.013
389.23	429.65	431.65	8.89	5.17	5.17		Source of Variation	SS	df	MS	F	P-value	F crit	Range	50.64	Range	51.19	Range	54			25.2	1.957	2.385	-5.2	0.414	-0.006	ANOVA								ANOVA
376.98	427.34	422	12.25	2.31	9.65		Between Groups	11.5778	2	5.78889	0.0330133	0.967536	3.08547	Minimum	0	Minimum	0	Minimum	0			30.4	1.543	2.391	9.9	0.497	-0.011	Source of Variation	SS	df	MS	F	P-value	F crit		Source of Variation	SS	df	MS	F	P-value	F crit
355.34	424.98	401	21.64	2.36	21		Within Groups	17885.7	102	175.35				Maximum	50.64	Maximum	51.19	Maximum	54			20.5	1.046	2.402	3.22	0.049	-0.004	Between Groups	0.0026463	2	0.00132315	0.000248172	0.999752	3.08547		Between Groups	649.564	2	324.782	20.1299	4.27974e-08	3.08547
349.89	421.78	382	5.45	3.2	19									Sum	451.01	Sum	429.47	Sum	456.36			17.28	0.997	2.406	1.17	0.641	-0.05	Within Groups	543.822	102	5.33159					Within Groups	1645.7	102	16.1343
341.87	416.45	347	8.02	5.33	35		Total	17897.3	104					Count	35	Count	35	Count	35			16.11	0.356	2.456	5.28	0.032	-0.222
322.34	371.78	293	19.53	44.67	54									Confidence Level(95.0%)	3.44155	Confidence Level(95.0%)	4.52822	Confidence Level(95.0%)	5.45209			10.83	0.324	2.678	1.92	0.324	-0.167	Total	543.825	104						Total	2295.26	104
311.98	352.84	279	10.36	18.94	14																	8.91	0	2.845	2.02	-3.4934	-0.153
299.89	324.93	258	12.09	27.91	21	B1 ADRR	12.9 + 10	MIN	0	MAX	50.64	SAM VARIANCE	132.39									6.89	3.4934	2.998	1.33	1.3911	-0.213
294.98	302.43	211	4.91	22.5	47	B2 ADRR	12.3 + 13.2	MIN	0	MAX	51.19	SAM VARIANCE	221.24									5.56	2.1023	3.211	-0.22	0.0459	-0.095		The data from analysis of variance has shown that the use of Chlorella vulgaris and biochar can significantly increase or decrease the accumulation of NH4 in cathodic chamber (P<0.05)
284.98	251.24	181	10	51.19	30	B3 ADRR	13 + 15.9	MIN	0	MAX	54	SAM VARIANCE	212.36									5.78	2.0564	3.306	-1.08	0.0215	-0.206	A2 DRR		B2 DRR		C2 DRR			A2 DRR		B2 DRR		C2 DRR
271.47	219.33	165	13.51	31.91	16																	6.86	2.0349	3.512	0.09	1.0316	-0.107														8.81 + 6.53
261.29	198.23	136	10.18	21.1	29		B1 NO3 REMOVAL EFFICIENCY			0.95												6.77	1.0033	3.619	0.19	-1.8323	-0.006	Mean	0.0564571	Mean	0.0574571	Mean	0.0675714		Mean	8.80663	Mean	3.35317	Mean	3.7276	3.35 + 1.85
253.82	187.92	107	7.47	10.31	29		B2 NO3 REMOVAL EFFICIENCY			0.94												6.58	2.8356	3.625	0.25	1.3678	-0.009	Standard Error	0.624981	Standard Error	0.19498	Standard Error	0.16845		Standard Error	1.10337	Standard Error	0.313195	Standard Error	0.259651	3.73 +1.54
238.98	165.88	78	14.84	22.04	29		B3 NO3 REMOVAL EFFICIENCY			0.999												6.33	1.4678	3.634	0.66	-1.7334	-0.073	Median	-0.001	Median	0.049	Median	-0.05		Median	6.8	Median	3.1023	Median	3.306
227.99	146.55	38	10.99	19.33	40			NH3	NO3													5.67	3.2012	3.707	0.12	-1.3663	-0.14	Mode	#N/A	Mode	#N/A	Mode	-0.001		Mode	#N/A	Mode	#N/A	Mode	2.365
220.11	111.45	3	7.88	35.1	35		Batch A	96	95													5.55	4.5675	3.847	-0.46	0.5444	-0.086	Standard Deviation	3.69744	Standard Deviation	1.15352	Standard Deviation	0.996564		Standard Deviation	6.52764	Standard Deviation	1.85289	Standard Deviation	1.53611
211.83	92.67	0.002	8.28	18.78	2.998		Batch B	97	94													6.01	4.0231	3.933	0.03	0.241	-0.361	Sample Variance	13.671	Sample Variance	1.3306	Sample Variance	0.99314		Sample Variance	42.6101	Sample Variance	3.4332	Sample Variance	2.35965
199.25	74.22	0.001	12.58	18.45	0.001		Batch C	67	99.9													5.98	3.7821	4.294	0.01	0.6476	-0.293	Kurtosis	3.35863	Kurtosis	10.8514	Kurtosis	28.8142		Kurtosis	3.17724	Kurtosis	-1.13986	Kurtosis	-0.273819
185.26	61.33	0.001	13.99	12.89	0																	5.97	3.1345	4.587	0.15	0.0362	-0.624	Skewness	0.0716534	Skewness	1.44612	Skewness	5.14436		Skewness	1.73658	Skewness	-0.00815986	Skewness	0.982172
176.97	50.98	0.001	8.29	10.35	0																	5.82	3.0983	5.211	-1.2	0.0872	-0.684	Range	20.1	Range	8.3679	Range	6.279		Range	28.424	Range	6.1345	Range	4.962
169.67	41.67	0.001	7.3	9.31	0																	7.02	3.0111	5.895	-1.65	-2.889	-0.324	Minimum	-10.2	Minimum	-3.4934	Minimum	-0.733		Minimum	1.976	Minimum	0	Minimum	2.364
152.87	38.53	0.001	16.8	3.14	0																	8.67	5.9001	6.219	-0.67	0.0878	-0.374	Maximum	9.9	Maximum	4.8745	Maximum	5.546		Maximum	30.4	Maximum	6.1345	Maximum	7.326
111.28	35.78	0.001	41.59	2.75	0																	9.34	5.8123	6.593	-0.53	1.2872	-0.733	Sum	1.976	Sum	2.011	Sum	2.365		Sum	308.232	Sum	117.361	Sum	130.466
98.91	32.88	0.001	12.37	2.9	0																	9.87	4.5251	7.326	0.69	0.291	0.532	Count	35	Count	35	Count	35		Count	35	Count	35	Count	35
71.93	29.01	0.001	26.98	3.87	0																	9.18	4.2341	6.794	-0.38	0.2216	0.683	Confidence Level(95.0%)	1.27011	Confidence Level(95.0%)	0.396247	Confidence Level(95.0%)	0.342332		Confidence Level(95.0%)	2.24232	Confidence Level(95.0%)	0.636489	Confidence Level(95.0%)	0.527674
21.29	27.65	0.001	50.64	1.36	0																	9.56	4.0125	6.111	-0.01	-0.862	0.565
21.2	24.89	0.001	0.09	2.76	0																	9.57	4.8745	5.546	#REF!	#REF!	#REF!
																									Anova: Single Factor
																									SUMMARY
																									Groups	Count	Sum	Average	Variance
																									A2 DRR	35	1.976	0.0564571	13.671
																									B2 DRR	35	2.011	0.0574571	1.9662
																									C2 DRR	35	2.365	0.0675714	0.99314
																									ANOVA
																									Source of Variation	SS	df	MS	F	P-value	F crit
																									Between Groups	0.0026463	2	0.00132315	0.000238687	0.999761	3.08547
																									Within Groups	565.433	102	5.54346
																									Total	565.435	104

## Sheet: Spp, genus, phyl & stand. curve
generating standard curve and determination of unknown sample
													Sample ID	Reads	0.9865
	Tube	Concentration	Absorbance												OTU	chao	coverage	shannon	simpson
	1	0.24	1.14										A1	24955	230	234	0.999519	3.75	0.0685
	2	0.2	0.916													-231248		(3.73,3.77)	(0.0668,0.0702)
	3	0.16	0.645										A2	7097	219	243	0.99535	3.64	0.0739
	4	0.12	0.446													-229275		(3.6,3.68)	(0.0704,0.0774)
	5	0.08	0.233										B1	22084	237	250	0.999185	4.18	0.0431
																-241276		(4.16,4.2)	(0.0415,0.0447)
													B2	15132	227	236	0.998877	3.45	0.1243
																-230254		(3.42,3.48)	(0.1197,0.1288)
													C1	7116	219	247	0.993957	3.44	0.0756
	Absorbance of unknown sample	4.456														-232279		(3.4,3.48)	(0.0727,0.0784)
	concentration of unknown (g/L)												C2	13738	236	262	0.997016	3.12	0.0969
																-248293		(3.09,3.16)	(0.0947,0.0992)
													Sample ID	Reads	0.9865
				OTU IDENTITY	A1 (%)	A2 (%)	B1 (%)	B2 (%)	C1 (%)	C2 (%)				reads	OTU	chao	shannon	simpson
				Acidobacteriota	4.09	3.17	9.07	4.64	1.61	1.42			A1	24955	230	234	3.75	0.0685
				Actinobacteriota	7.45	9.55	4.11	2.76	7.85	4.48			A2	7097	219	243	3.64	0.0739
				Armatimonadota	1.14	0.82	1.1	1.83	0.21	0.06			B1	22084	237	250	4.18	0.0431
				Bacteroidota	0.46	0.27	2.09	1.08	0.35	0.35			B2	15132	227	236	3.45	0.1243
				Chloroflexi	1.08	0.89	0.79	0.39	1.16	0.65			C1	7116	219	247	3.44	0.0756
				Desulfobacterota	0.82	0.31	0.55	0.65	0.17	0.17			C2	13738	236	262	3.12	0.0969
				Firmicutes	56.64	57.09	46.53	33.23	65.31	68.58							coverage
				Nitrospirota	0.08	0.07	0	0	0.01	0.01							0.999519
				Planctomycetota	10.02	6.31	8.57	4.44	1.99	1.78							0.99535
				Proteobacteria	16.65	20.54	25.6	49.98	21.01	22.07							0.999185
				SAR324 clade(Marine group B)	0.01	0.03	0.07	0.01	0.07	0.06							0.998877
				Synergistota	0.03	0.03	0.04	0.03	0.01	0							0.993957
				Verrucomicrobiota	1.1	0.68	0.54	0.31	0.18	0.18							0.997016
				WPS-2	0.41	0.24	0.94	0.65	0.07	0.2		Anova: Two-Factor Without Replication
				OTU IDENTITY	A1 (%)	A2 (%)	B1 (%)	B2 (%)	C1 (%)	C2 (%)		SUMMARY	Count	Sum	Average	Variance
			Phylum	Firmicutes	56.64	57.09	46.53	33.23	65.31	68.58		A1	5	25422.8	5084.56	1.23399e+08
				Proteobacteria	16.65	20.54	25.6	49.98	21.01	22.07		A2	5	7562.71	1512.54	9.75888e+06
				Planctomycetota	10.02	6.31	8.57	4.44	1.99	1.78		B1	5	22575.2	4515.04	9.64734e+07
				Actinobacteriota	7.45	9.55	4.11	2.76	7.85	4.48		B2	5	15598.6	3119.71	4.51054e+07
				Acidobacteriota	4.09	3.17	9.07	4.64	1.61	1.42		C1	5	7585.52	1517.1	9.80961e+06
				Armatimonadota	1.14	0.82	1.1	1.83	0.21	0.06		C2	5	14239.2	2847.84	3.70765e+07
				Verrucomicrobiota	1.1	0.68	0.54	0.31	0.18	0.18
				Chloroflexi	1.08	0.89	0.79	0.39	1.16	0.65		reads	6	90122	15020.3	5.51015e+07
				Desulfobacterota	0.82	0.31	0.55	0.65	0.17	0.17		OTU	6	1368	228	62.4
				Nitrospirota	0.08	0.07	0	0	0.01	0.01		chao	6	1472	245.333	104.667
				Bacteroidota	0.46	0.27	2.09	1.08	0.35	0.35		shannon	6	21.58	3.59667	0.127787
				WPS-2	0.41	0.24	0.94	0.65	0.07	0.2		simpson	6	0.4823	0.0803833	0.00075953
				Synergistota	0.03	0.03	0.04	0.03	0.01	0
				SAR324 clade(Marine group B)	0.01	0.03	0.07	0.01	0.07	0.06
			Genus	Tissierella	17.6553	15.5559	12.3996	8.44019	18.1062	13.5973		ANOVA
				Atopostipes	14.8373	9.14471	6.6507	3.87488	1.76131	1.36677		Source of Variation	SS	df	MS	F	P-value	F crit
				Sporosarcina	14.5554	24.0806	21.4598	16.6408	38.0161	47.668		Rows	5.5152e+07	5	1.10304e+07	1.00114	0.442403	2.71089
				Trichococcus	4.67803	4.15669	0.394533	0.450895	1.73313	1.54995		Columns	1.06613e+09	4	2.66534e+08	24.1911	2.0187e-07	2.86608
				Candidatus Competibacter	3.6917	2.26856	1.28223	0.61998	1.04269	0.479076		Error	2.20356e+08	20	1.10178e+07
				Romboutsia	3.26899	2.88854	1.90221	1.57813	0.676342	0.479076
				Gemmataceae_uncultured	3.14217	2.00085	2.19811	1.19769	0.61998	0.634071		Total	1.34164e+09	29
				Paeniglutamicibacter	3.05763	4.81894	0	0.0140905	4.02987	1.95857
				Rhodobacter	2.16993	2.22629	2.804	1.80358	0.831337	0.577709
				Pirellulaceae_uncultured	2.08539	1.15542	1.64858	0.789066	0.352262	0.211357
				Others	29.0686	31.7035	49.2603	64.5907	32.8308	31.4781
			Species	Tissierella_uncultured bacterium	17.6553	15.5559	12.0473	8.14429	18.1062	13.5832
				Atopostipes_uncultured bacterium	13.71	8.18656	4.02987	2.57855	1.38087	1.09906
				Sporosarcina_uncultured bacterium	13.4	23.0943	19.4589	11.6105	19.5153	20.9384
				Trichococcus_Unclassified	4.53713	3.86079	0.394533	0.408623	1.54995	1.31041
				Candidatus Competibacter_uncultured bacterium	3.6917	2.26856	1.28223	0.61998	1.04269	0.479076
				Romboutsia_uncultured bacterium	3.26899	2.88854	1.90221	1.57813	0.676342	0.479076
				metagenome	3.18444	2.04312	2.5081	1.53586	1.16951	0.746794
				Gemmataceae_uncultured bacterium	3.14217	2.00085	2.19811	1.19769	0.61998	0.634071
				Paeniglutamicibacter_Unclassified	3.05763	4.81894	0	0.0140905	4.02987	1.95857
				Rhodobacter_uncultured bacterium	2.14175	2.16993	2.76173	1.78949	0.803156	0.563618
				Planctomycetales_uncultured bacterium	1.73313	0.92997	2.05721	1.00042	0.493166	0.380442
				Bradyrhizobium_Unclassified	1.43723	1.09906	0.676342	0.493166	0.239538	0.140905
				DS-100_uncultured bacterium	1.40905	1.1836	4.73439	2.24038	0.563618	0.436804
				IMCC26207_uncultured bacterium	1.38087	1.15542	1.05678	0.718613	0.648161	0.366352
				Ottowia_Unclassified	1.36677	0.887699	2.70537	1.84585	0.352262	0.324081
				Others	24.8838	27.8568	42.1868	64.2243	48.8094	56.5591

## Sheet: GC results and standard curves
sample A1				Sample A2				N2O				CH4
	N2O	CH4	CO2	N2O	CH4	CO2		N2O (%)	Standard (mL)	peak area		CH4 (%)	Standard (mL)	peak area
Peak Area	3295.72	2834.13	12.438	1797.56	30.3013	4105.06		20	0.5	797.558		20	0.5	898.282
Retention Time	4.091	2.098	3.51	4.091	2.096	3.512		40	1	1507.02		40	1	1688.28
								60	1.5	2457.47		60	1.5	2586.56
sample B1				Sample B2				80	2	3190.23		80	2	3593.13
	N2O	CH4	CO2	N2O	CH4	CO2		100	2.5	3975.91		100	2.5	4273.13
Peak Area	3842.93	2145.28	8.6378	729.607	28.5869	5779.48		Sample ID	Estimated concentration	Detector response (Peak area)		Sample ID	Estimated concentration	Detector response (Peak area)
Retention Time	4.094	2.099	3.51	4.091	2.1	3.51		A1	2.06498	3295.72		A1	1.63032	2834.13
								A2	1.13493	1797.56		A2	0.0153136	30.3013
sample C1				Sample C2				B1	2.40468	3842.93		B1	1.23354	2145.28
	N2O	CH4	CO2	N2O	CH4	CO2		B2	0.471939	729.607		B2	0.014326	28.5869
Peak Area	2365.73	1978.18	13.5437	525.238	19.8172	3974.62		C1	1.48764	2365.73		C1	1.1373	1978.18
Retention Time	4.094	2.1	3.51	4.094	2.099	3.51		C2	0.345067	525.238		C2	0.00927467	19.8172
							Conc. Of unknown =		1.7169			CO2
												CO2 (%)	Standard (mL)	peak area
												20	0.5	1211.5
												40	1	2111.5
												60	1.5	3322.99
												80	2	4522.99
												100	2.5	6057.48
												Sample ID	Estimated concentration	Detector response (Peak area)
												A1	0.0933361	12.438
												A2	1.77035	4105.06
												B1	0.0917789	8.6378
												B2	2.45647	5779.48
												C1	0.0937892	13.5437
												C2	1.7169	3974.62
